# Supplementary material for: Amorphous zinc-doped silicon oxide (SZO) resistive switching memory: manipulated bias control from selector to memristor
Source: Royal Society of Chemistry journal article supplement (doi:10.1039/c3tc32166e), 2014-01-01
Supplement: c3tc32166e1.pdf [file c3tc32166e1.pdf]

## Supplementary information

### Amorphous zinc-doped silicon oxide (SZO) resistive switching memory: manipulated bias control from selector to memristor

Jian-Shiou Huang<sup>1</sup>, Wen-Chun Yen<sup>1</sup>, Shih-Ming Lin<sup>1</sup>, Chi-Yung Lee<sup>1</sup>, Jiang Wu<sup>3</sup>, Zhiming M. Wang<sup>3</sup>,  
Tsung-Shune Chin<sup>2,\*</sup>, and Yu-Lun Chueh<sup>1,\*</sup>

<sup>1</sup> Department of Materials Science and Engineering, National Tsing Hua University, Hsinchu, 30043, Taiwan

<sup>2</sup> Department of Materials Science and Engineering, Feng Chia University, Taichung, 40724, Taiwan.

<sup>3</sup> State Key Laboratory of Electronic Thin Films and Integrated Devices, University of Electronic Science and Technology of China, Chengdu 610054, P. R. China.

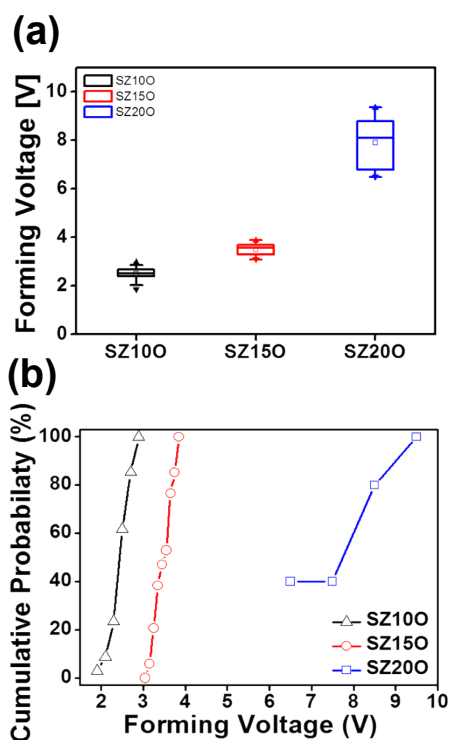

**Figure S1** (a) Box chart of forming voltages at different fabrication conditions. (b) Cumulative probability of forming voltages obtained from different fabrication conditions.

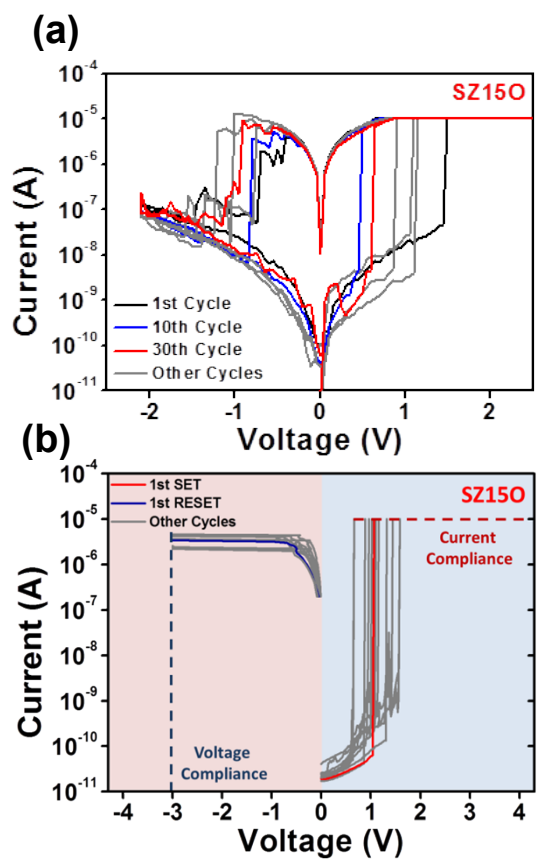

**Figure S2 (a)** A ‘butterfly’ shape operation mode for 30 cycles. **(b)** 100-cycle endurance results from V-SET and i-RESET operation modes.
